# Supplementary material
Source: publisher figshare collection journal article supplement (https://wiley.figshare.com/articles/dataset/_/3529535)
Supplement: Supplementary file 1 [file 1 › appendix-A.htm]

Ecological Archives E089-098-A1


### *Ecological Archives* E089-098-A1

### **Peter A. Abrams. 2008. Measuring the impact of dynamic antipredator traits on predator–prey–resource interactions. *Ecology* 89:1640–1649.**

Appendix A. Analysis of the model with predator avoidance via lower activity rate for zero handling times. Click here for a PDF file of the appendix.

---


[Back to E089-098]
