# Supplementary material
Source: publisher figshare collection journal article supplement (https://wiley.figshare.com/articles/dataset/_/3529535)
Supplement: Supplementary file 1 [file 1 › appendix-A.pdf]

Peter A. Abrams. 2008. Measuring the impact of dynamic antipredator traits on predator-prey-resource interactions. *Ecology* 89:1640-1649.

Appendix A: Analysis of the model with predator avoidance via lower activity rate for zero handling times.

*Equilibrium densities in the presence of adaptive behavior and the predator*

The following densities are obtained by solving Eqs. 1a,b after setting handling times to zero, and substituting expression (2) for C.

$$\hat{R} = (1/B) \left( d_1 + s_1 P + 2\sqrt{(d_0 + s_0 P)(d_2 + s_2 P)} \right) \quad (\text{A.1a})$$

$$\hat{N} = \frac{r \left( (KB - d_1 - s_1 P) \sqrt{\frac{d_2 + s_2 P}{d_0 + s_0 P}} - 2(d_2 + s_2 P) \right)}{KB} \quad (\text{A.1b})$$

$$\hat{C} = \sqrt{\frac{d_0 + s_0 P}{d_2 + s_2 P}} \quad (\text{A.1c})$$

Taking derivatives with respect to P shows that R always increases with P: C always increases with P if  $d_2/s_2 > d_0/s_0$ , and always decreases with P if this inequality is reversed; and N may either decrease with P for all values of P (true when the equilibrium C increases with P), or may increase with P at low values and decrease with P at higher values of P. The latter (unimodal) outcome can only occur when  $d_2/s_2 < d_0/s_0$  (implying that the equilibrium C declines with P) and when K is sufficiently large. The critical value of K may be shown to be:

$$K_{crit} = \frac{2d_0d_2s_1 + d_0d_1s_2 + 4d_0s_2\sqrt{d_0d_2} - d_1d_2s_0}{B(d_0s_2 - d_2s_0)}$$

The above equations also provide the equilibrium in the absence of the predator, simply by substituting  $P = 0$ ; in this case,

$$\hat{R} = \frac{d_1 + 2\sqrt{d_0d_2}}{B}; \hat{C} = \sqrt{\frac{d_0}{d_2}}; \hat{N} = \frac{r \left[ (KB - d_1) \sqrt{\frac{d_2}{d_0}} - 2d_2 \right]}{KB} \quad (\text{A.2a,b,c})$$

## 2. Equilibrium densities in the presence of adaptive defense but the absence of actual predation

(Here  $P$  denotes the number of predators to which the cue corresponds).

$$\hat{R} = \frac{d_1d_2 + 2d_1s_2P + s_1s_2P^2 + (d_2 + s_2P)\sqrt{s_1^2P^2 + 4d_0(d_2 + 2s_2P)}}{B(d_2 + 2s_2P)} \quad (\text{A.3a})$$

$$\hat{C} = \frac{-s_1P + \sqrt{4d_0d_2 + s_1^2P^2 + 8d_0s_2P}}{2(d_2 + 2s_2P)} \quad (\text{A.3b})$$

$$\hat{N} = \frac{2r \left[ KB(d_2 + 2s_2P) - \left( d_1d_2 + 2d_1s_2P + s_1s_2P^2 + (d_2 + s_2P)\sqrt{s_1^2P^2 + 4d_0(d_2 + 2s_2P)} \right) \right]}{KB \left[ -s_1P + \sqrt{s_1^2P^2 + 4d_0(d_2 + 2s_2P)} \right]} \quad (\text{A.3c})$$

These formulas are rather complicated, but it is possible to determine how they change with  $P$  in some circumstances. Taking derivatives of the above formulas shows that the equilibrium  $C$  must decrease with  $P$  when  $P$  is close to zero. The short term response of  $C$  to increased  $P$  is also a decrease, regardless of the initial value of  $P$ . This decrease leads to the possibility that greater predator density increases the equilibrium prey density by forcing the prey to exploit the resource more prudently. The derivative of the equilibrium  $N$  with respect to  $P$  is positive when

$$P < \frac{d_1^2 - 4d_0d_2 - 2KBd_1 + (KB)^2}{2(-d_1s_1 + KBs_1 + 4d_0s_2)},$$

and  $\hat{N}$  decreases with  $P$  when this threshold value is exceeded. This means that there is some range of  $P$  for which the equilibrium  $N$  increases with  $P$  provided  $d_2 < (BK - d_1)^2 / (4d_0)$ , but this latter inequality is implied if  $N$  is able to achieve a positive population density in the absence of  $P$ .

### 3. Equilibrium in a case with predation, but no anti-predator behavior

Here  $C$  takes on the optimum it would have in the absence of predators;  $C = (BR - d_1) / (2d_2)$ . By substituting this in the equation for  $dN/dt$ , we obtain an expression of the equilibrium  $R$  in the absence of behavior and the presence of the predator. This can in turn be used to get an equilibrium  $C$  and  $R$  under the same conditions:

$$\hat{R} = \frac{d_1 d_2 + (s_1 d_2 - s_2 d_1)P + d_2 \sqrt{s_1^2 P^2 - 4s_0 s_2 P^2 + 4(d_2 s_0 - d_0 s_2)P + 4d_0 d_2}}{B(d_2 - s_2 P)}$$

$$\hat{N} = \frac{-4rd_2(d_0 + s_0 P) + r(KB - d_1) \left( -s_1 P + \sqrt{s_1^2 P^2 - 4s_0 s_2 P^2 + 4(d_2 s_0 - d_0 s_2)P + 4d_0 d_2} \right)}{2KB(d_0 + s_0 P)}$$

$$\hat{C} = \frac{s_1 P + \sqrt{s_1^2 P^2 - 4s_0 s_2 P^2 + 4(d_2 s_0 - d_0 s_2)P + 4d_0 d_2}}{2(d_2 - s_2 P)} \quad (\text{A.4a,b,c})$$

Taking derivatives of these formulas shows that  $C$  increases with  $P$ ,  $R$  increases with  $P$ , and  $N$  decreases with  $P$  in this case.

The only additional treatment discussed in the text is a system in which predators are absent; equilibrium densities are obtained from Eqs. A.1 by substituting  $P = 0$ .
